# Supplementary material for: Distribution-based pooling for combination and multi-model bias correction of climate simulations
Source: Copernicus journal article supplement (doi:10.5194/esd-15-735-2024), 2024-06-13
Supplement: Supplementary file 1 [file esd-15-735-2024-supplement.pdf]

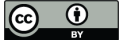

*Supplement of*

## **Distribution-based pooling for combination and multi-model bias correction of climate simulations**

**Mathieu Vrac et al.**

*Correspondence to:* Mathieu Vrac ([mathieu.vrac@lsce.ipsl.fr](mailto:mathieu.vrac@lsce.ipsl.fr)) and Grégoire Mariéthoz ([gregoire.mariethoz@unil.ch](mailto:gregoire.mariethoz@unil.ch))

The copyright of individual parts of the supplement might differ from the article licence.

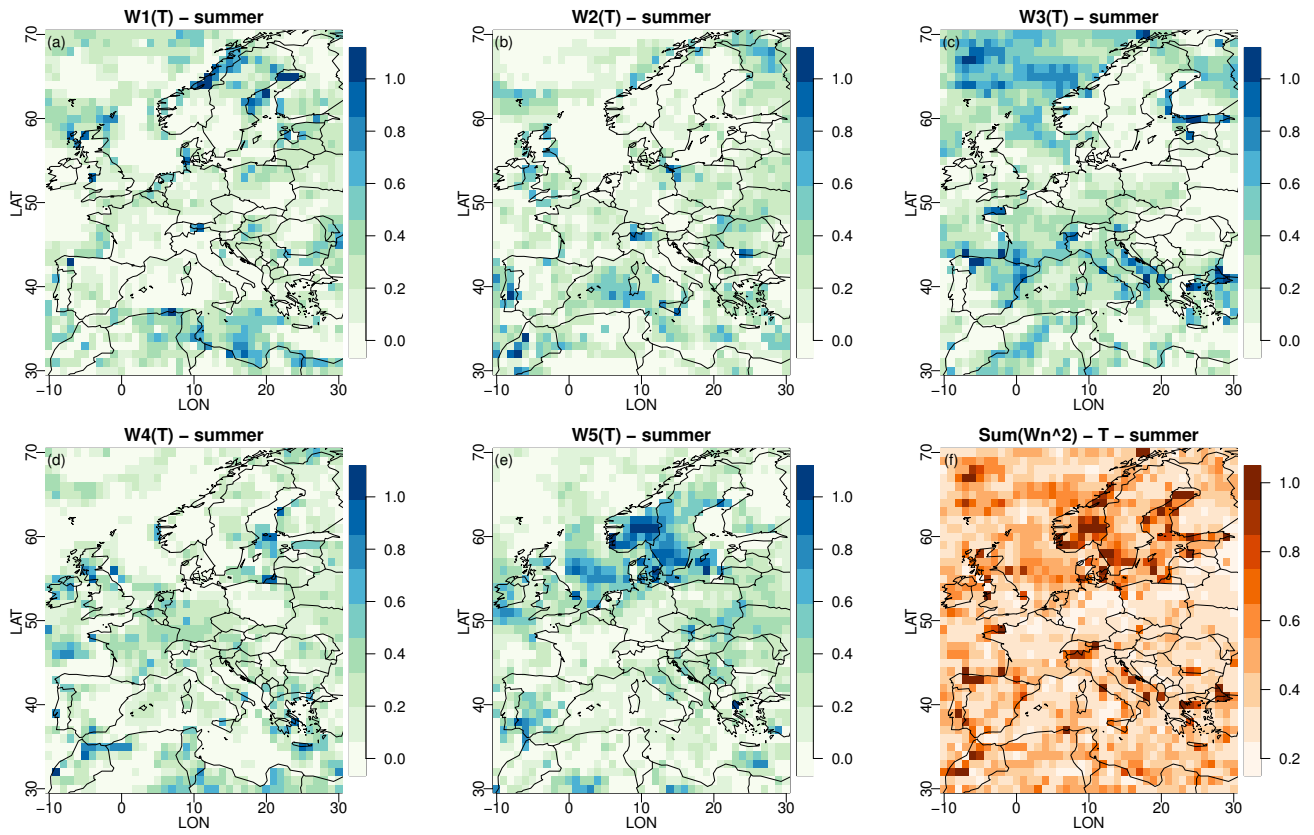

**Figure S1.** Maps of the weights parameters from  $\alpha$ -pooling for summer obtained with the ERA5 experiment for temperature over summer. Panel (f) displays the sum of the squares of the 5 normalized weights.

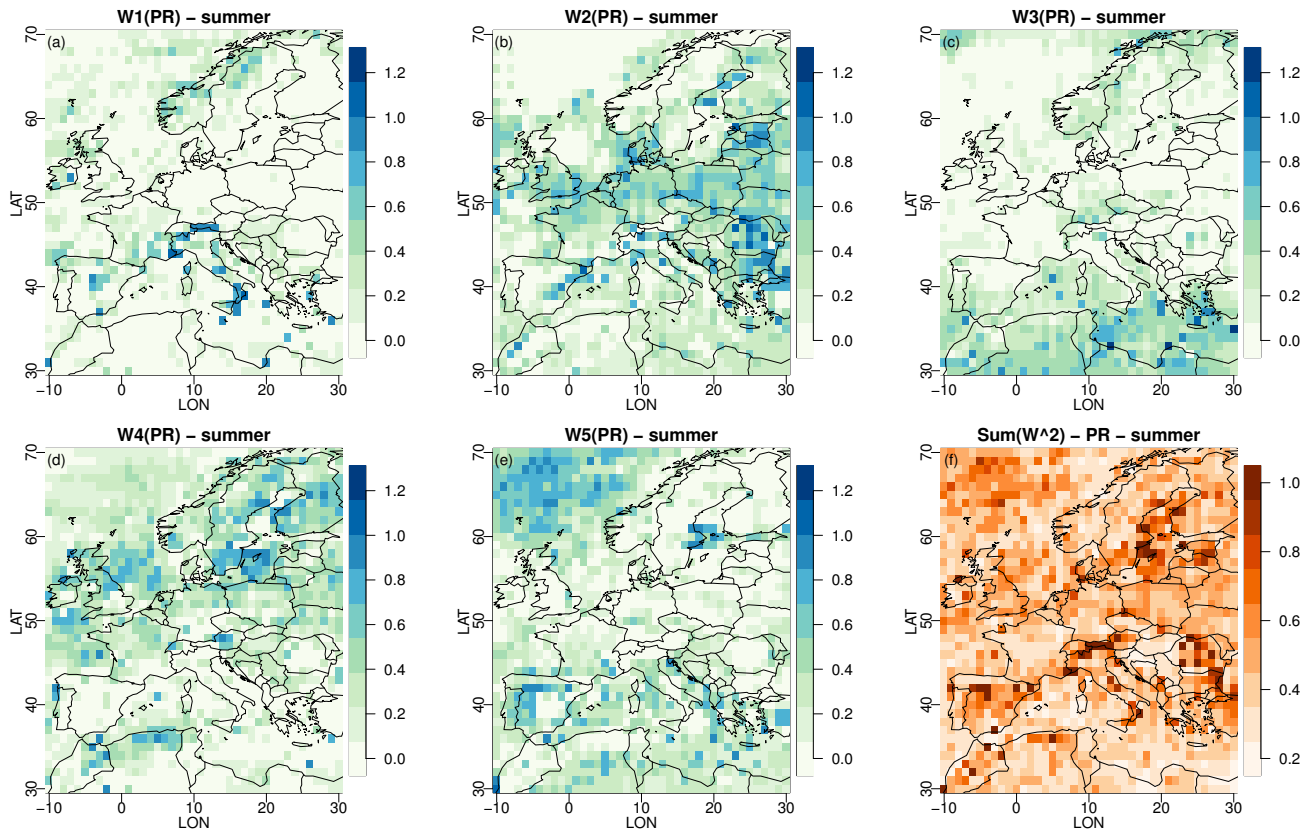

**Figure S2.** Same as Fig. S1 but for precipitation.

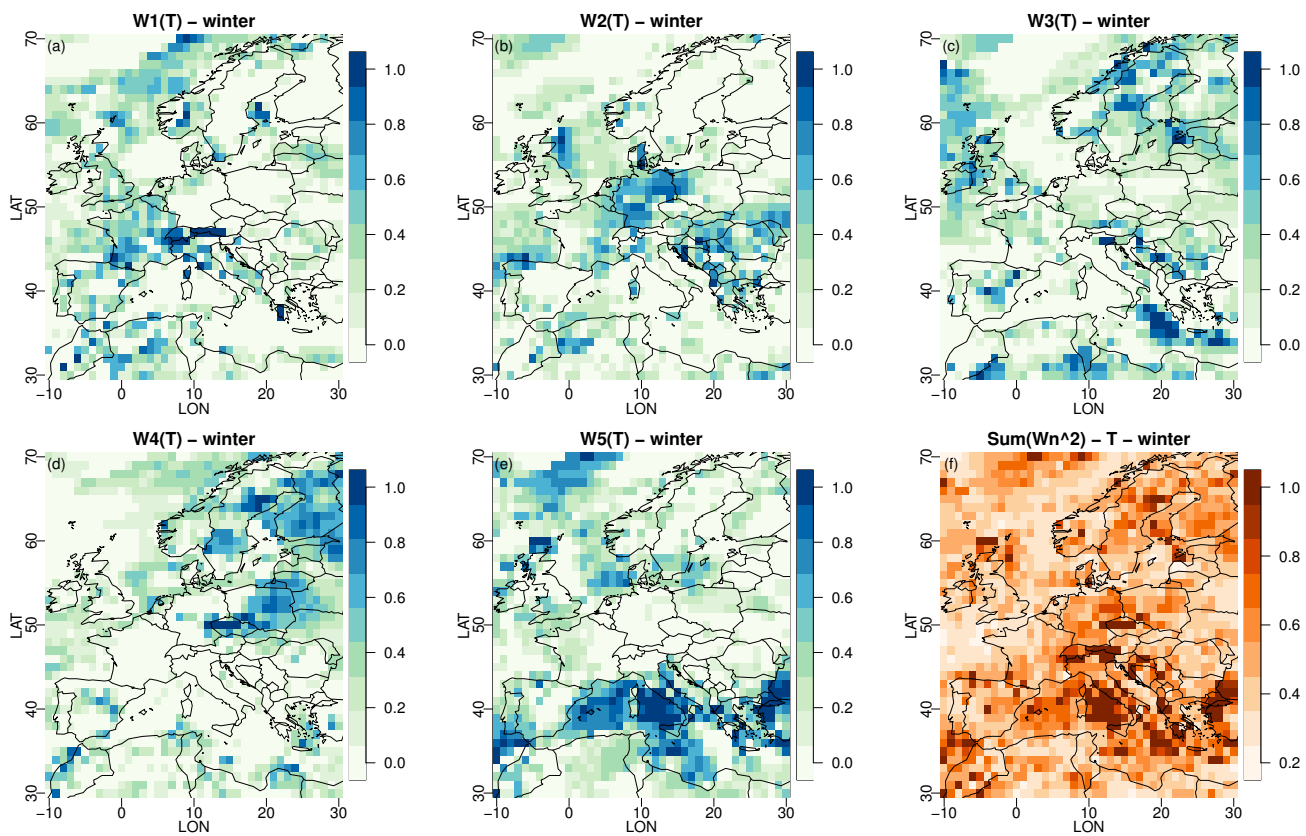

**Figure S3.** Maps of the weights parameters from linear pooling for winter obtained with the ERA5 experiment for temperature. Panel (f) displays the sum of the squares of the 5 weights.

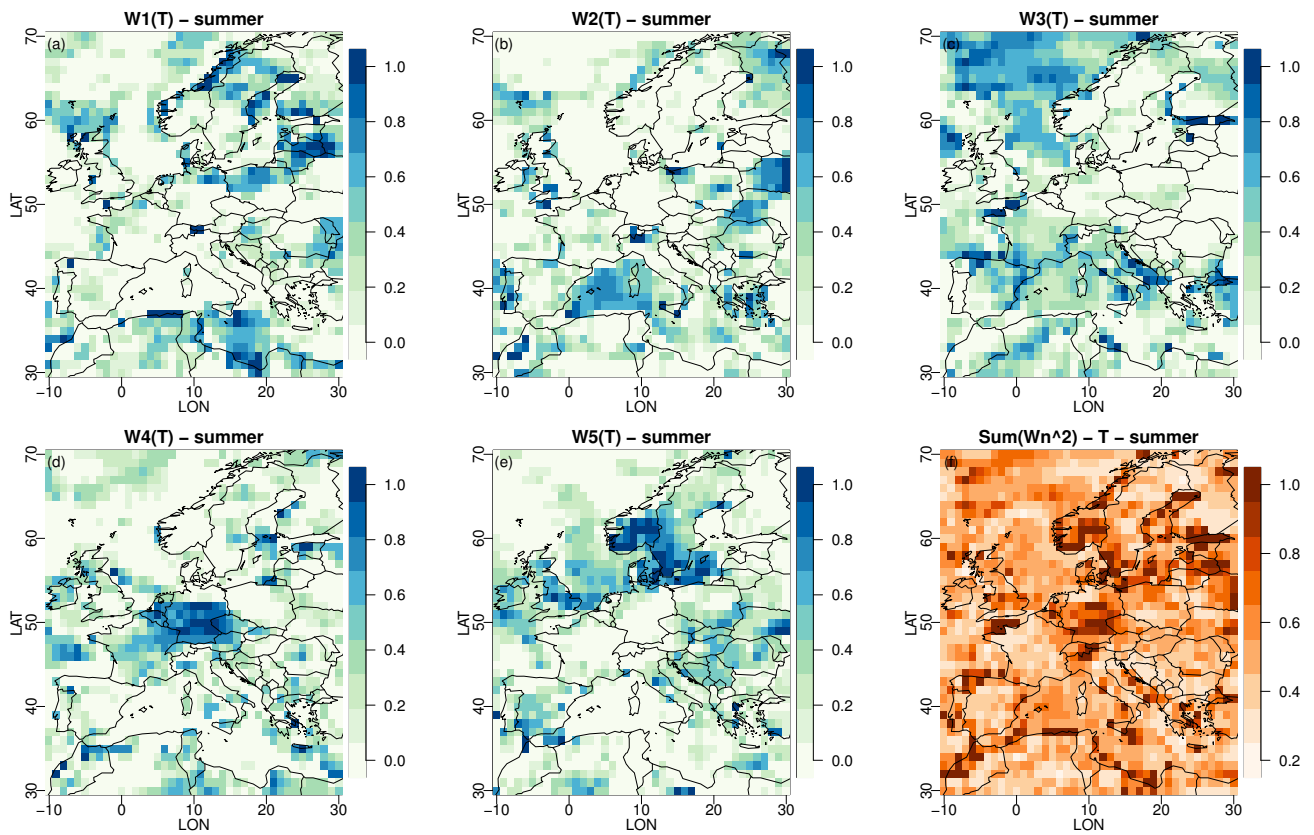

**Figure S4.** Same as figure S3 but for summer.

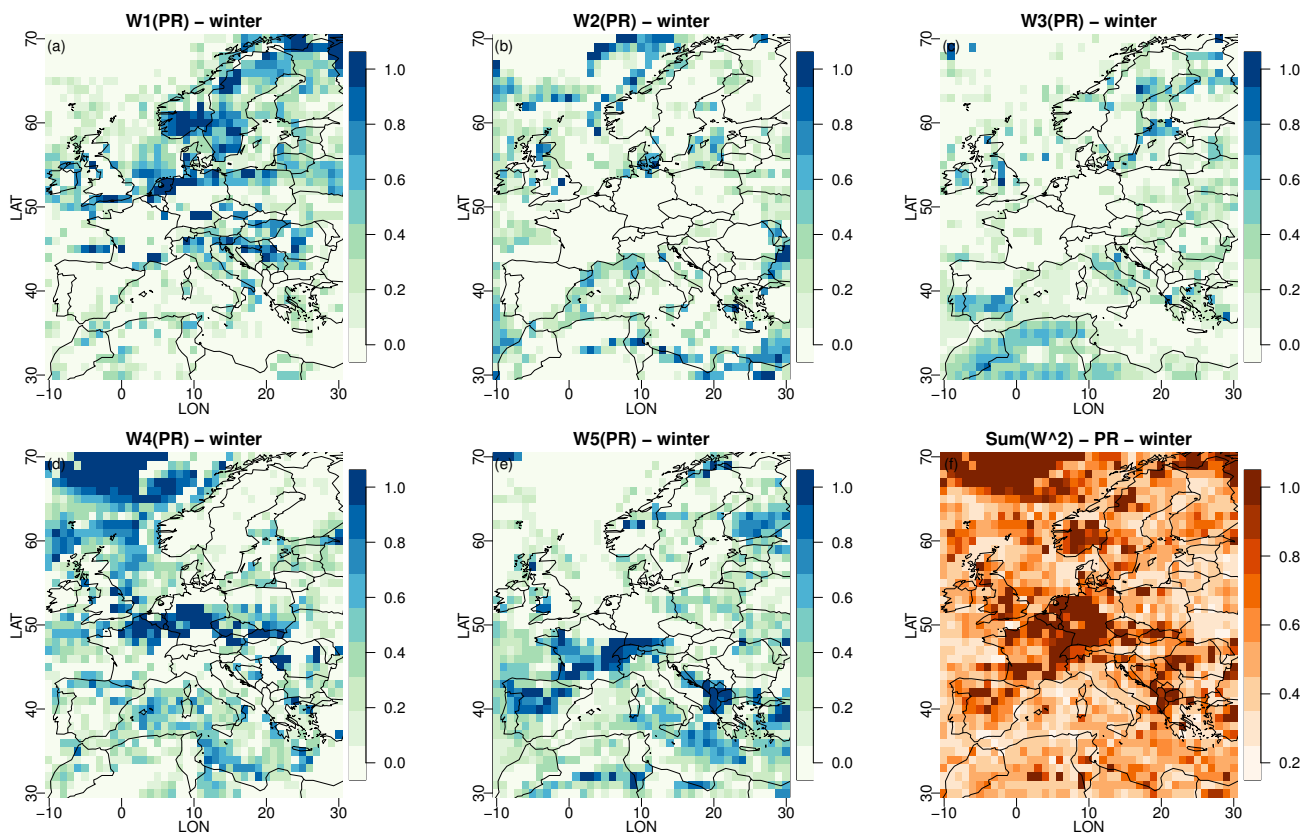

**Figure S5.** Maps of the weights parameters from linear pooling for winter obtained with the ERA5 experiment for precipitation. Panel (f) displays the sum of the squares of the 5 weights.

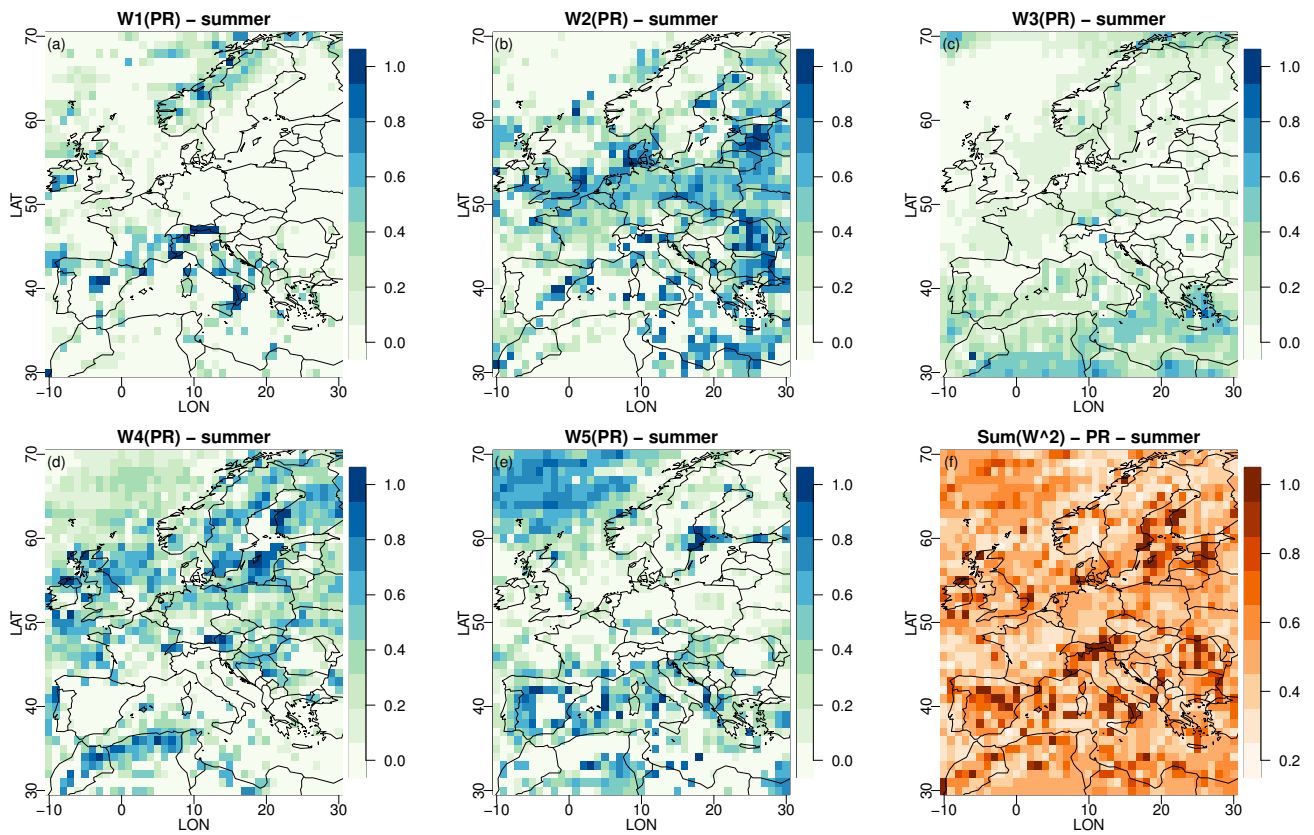

**Figure S6.** Same as figure S5 but for summer.

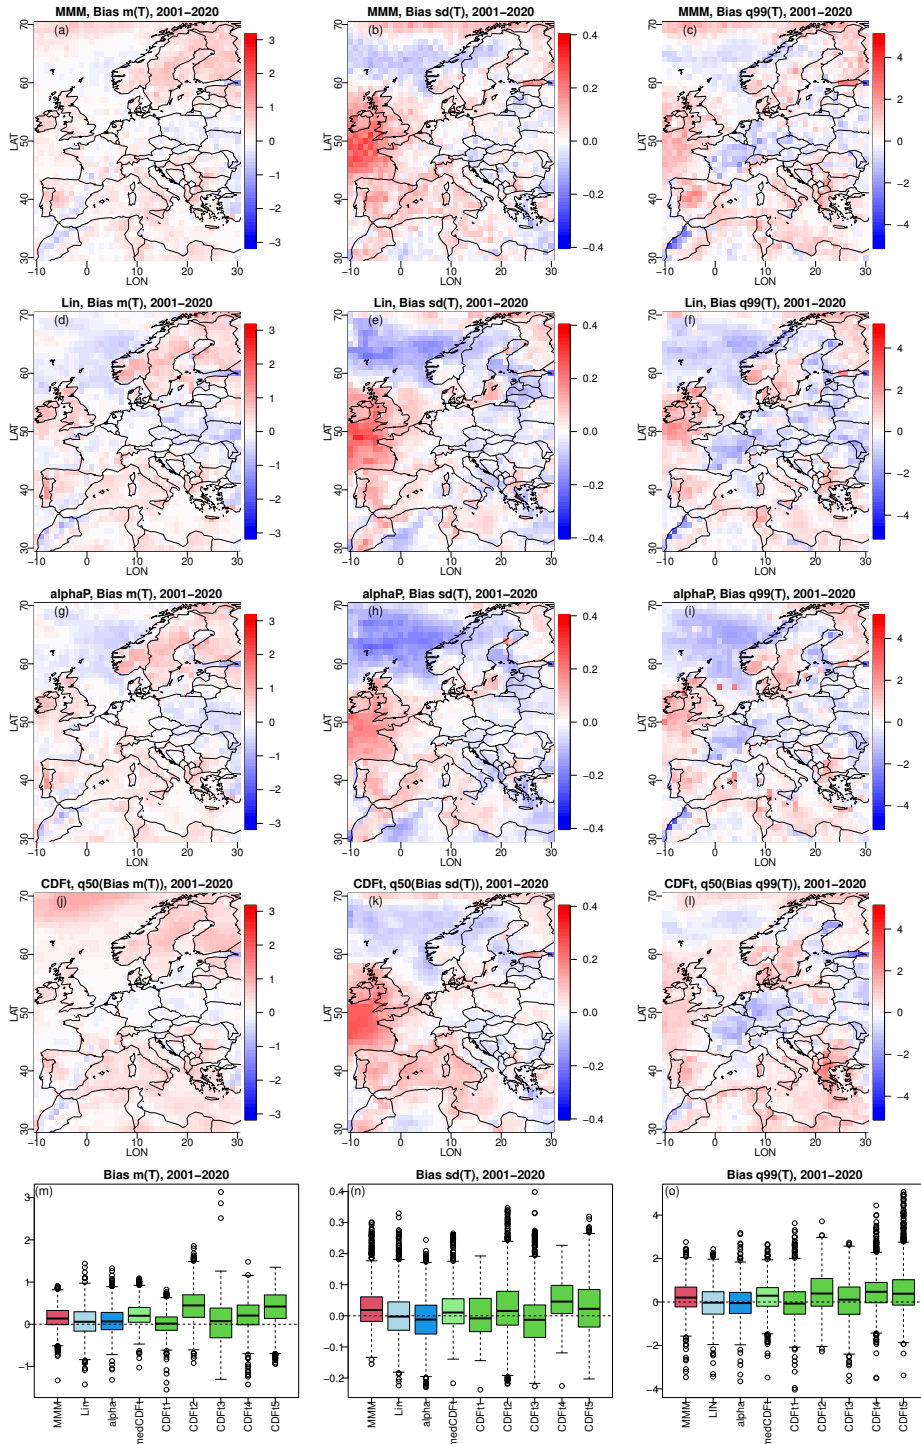

**Figure S7.** Biases in mean, standard deviation and 99% quantile for summer temperature from MMM,  $\alpha$ -pooling, CDFt and linear-pooling under the 2001-2020 (projection) time period of the ERA5 experiment.



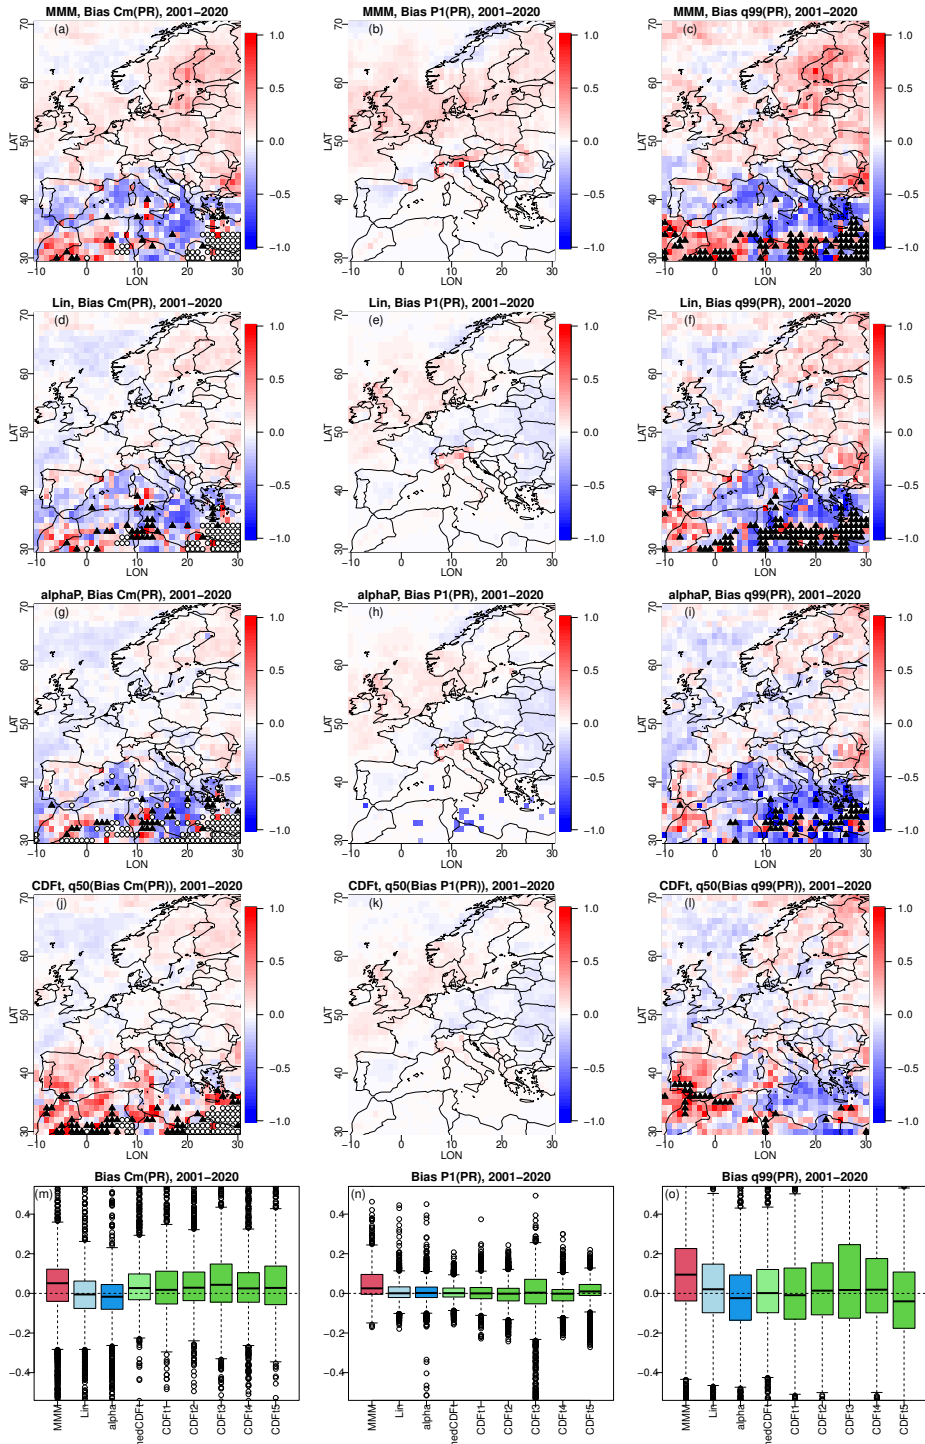

Figure S8. Same as Fig. S7 but for summer precipitation.

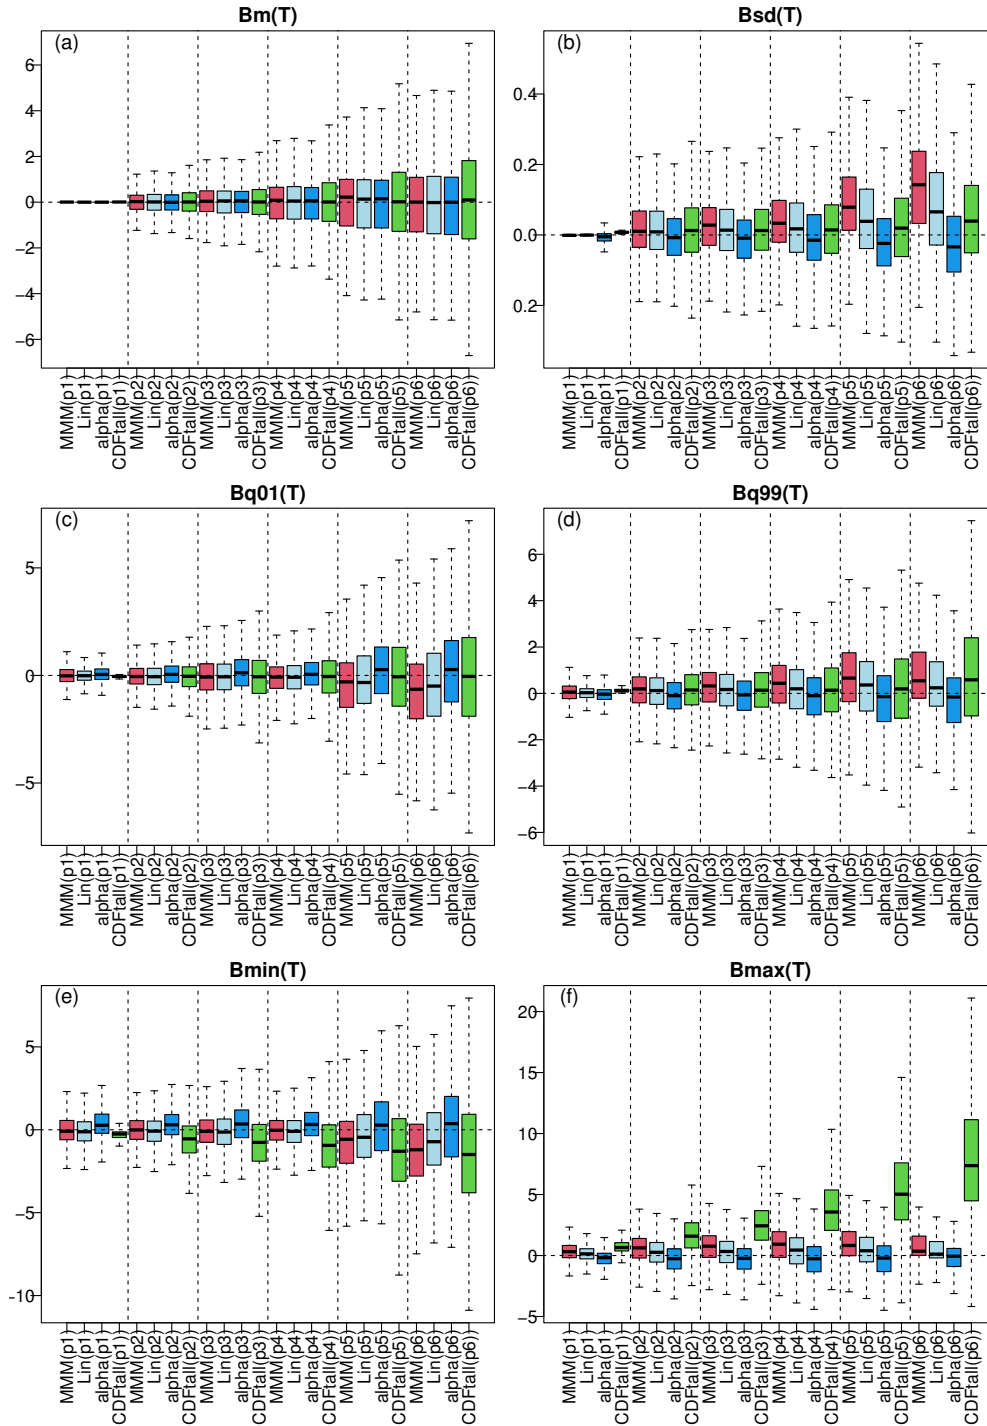

**Figure S9.** Boxplots of biases in summer temperature from the three methods (red=MMM, light blue=linear pooling, blue= $\alpha$ -pooling, green=CDFt) for the six 20-year time periods (from p1=1981-2000=calibration to p6=2081-2100). The different panels display biases in (a) mean temperature, (b) standard deviation, (c) 1% quantile, (d) 99% quantile, (e) minimum and (f) maximum temperature.

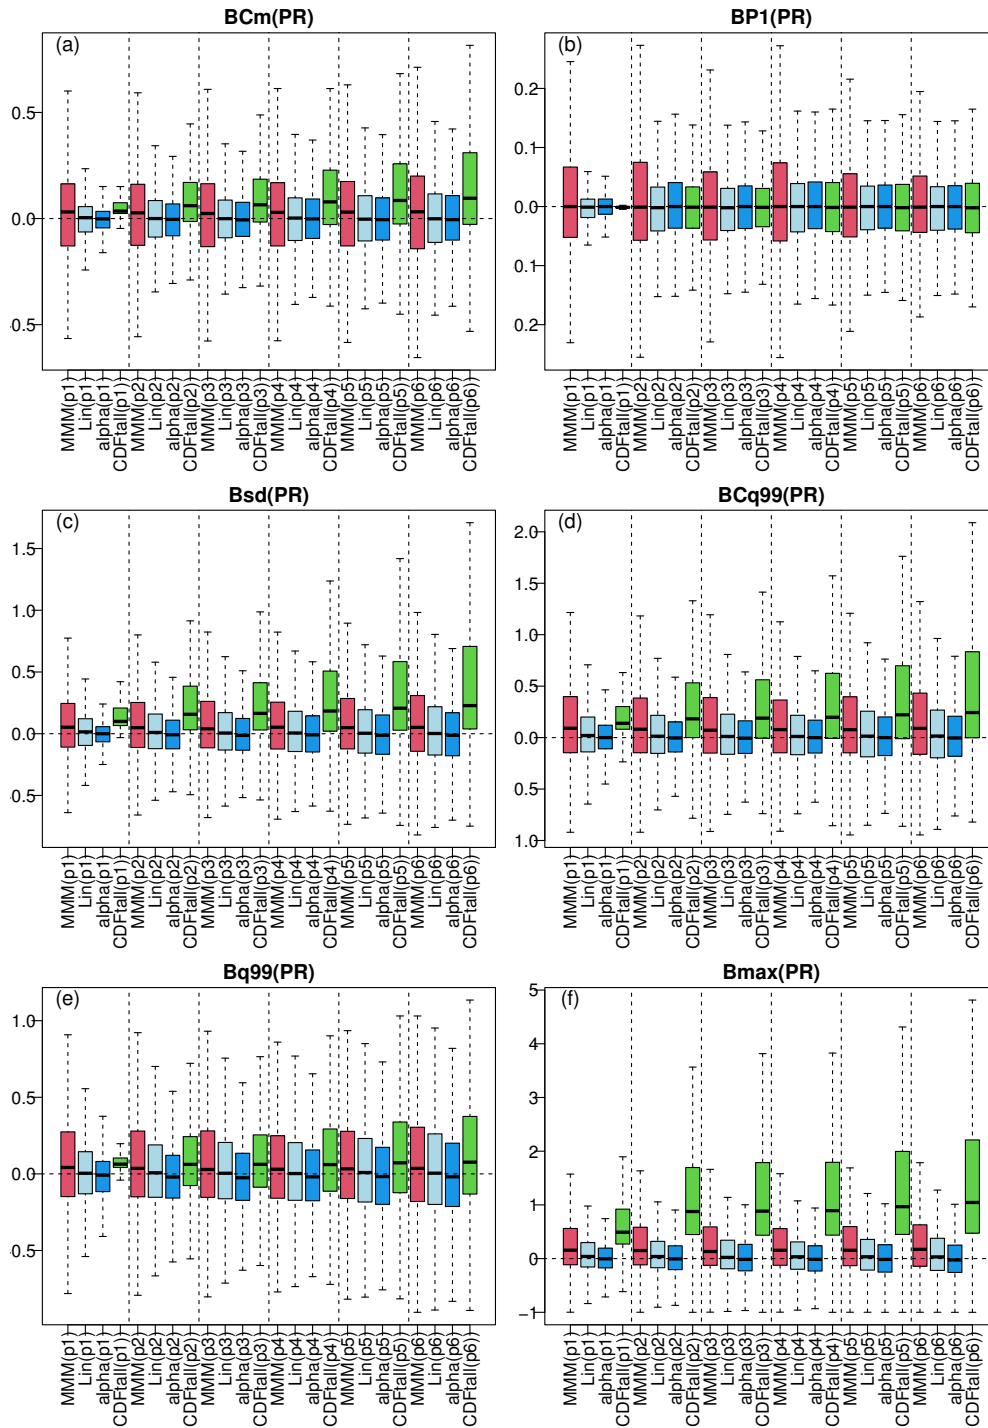

**Figure S10.** Same as Fig. S9 but for precipitation. The different panels display biases in (a) conditional mean precipitation given wet, (b) probability of dry (< 1mm) day, (c) standard deviation, (d) conditional 99% quantile given wet, (e) unconditional 99% quantile, and (f) maximum precipitation.

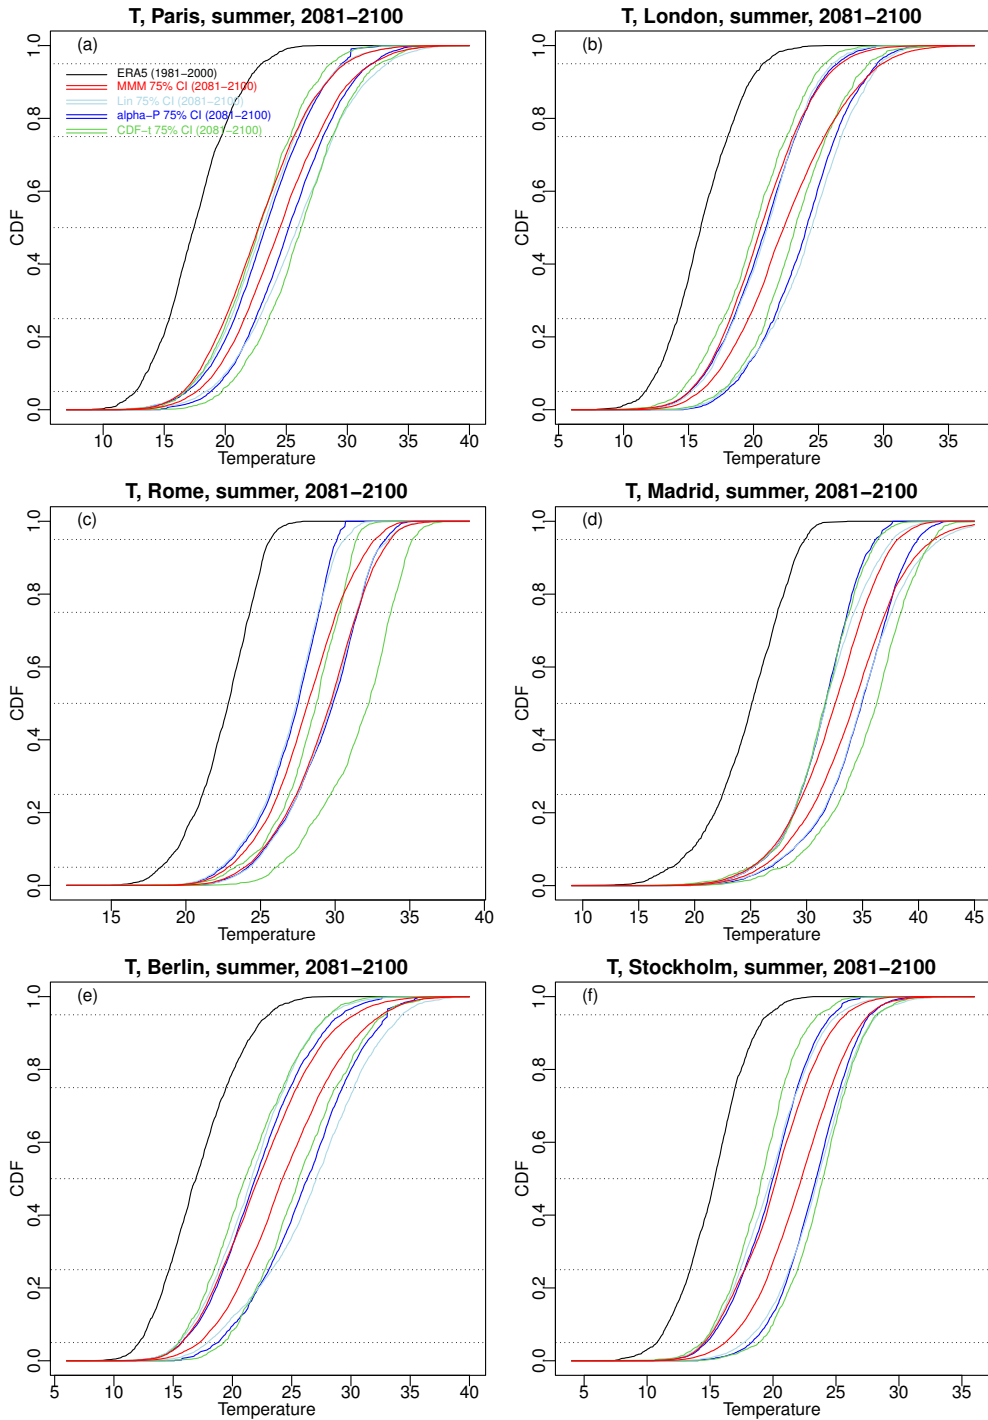

**Figure S11.** For summer temperature over 2081–2100 and 6 major cities in western Europe, 75% confidence intervals for MMM (red lines), linear pooling (light blue line),  $\alpha$ -pooling (blue lines), and CDFt (green blue lines). The temperature ERA5 CDF (black line) over 1981–2000 is also displayed for visual evaluation of changes.

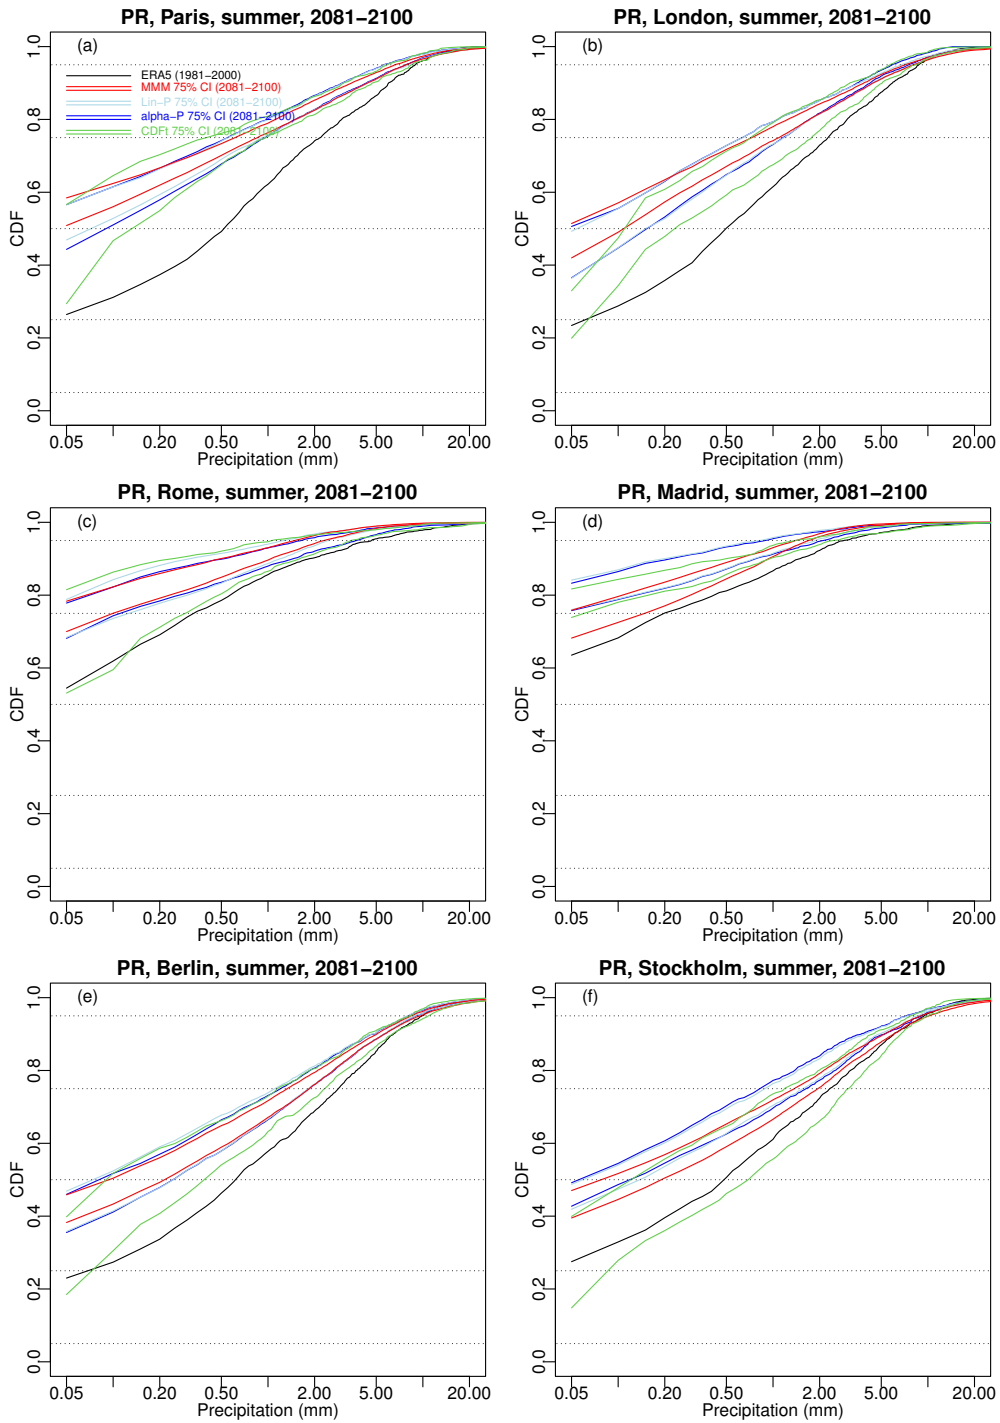

**Figure S12.** Same as Fig. S11 but for precipitation. Note that the x-axis is displayed in log-scale to ease evaluation.

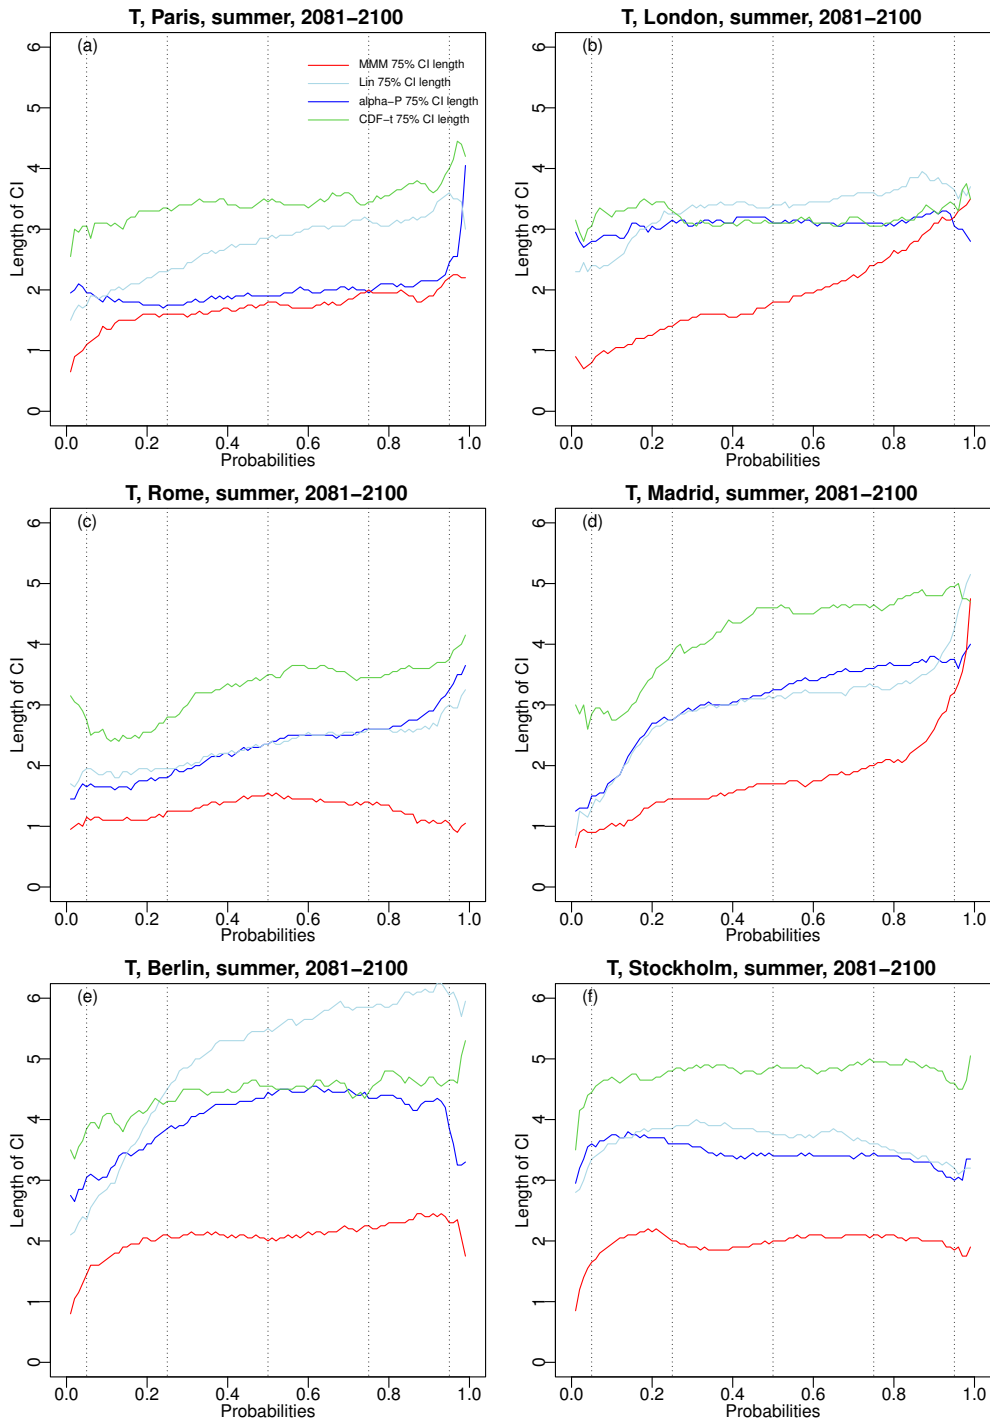

**Figure S13.** For summer temperature over 2081-2100 and 6 major cities in western Europe, length of the 75% CDF confidence intervals for MMM (red line), linear pooling (light blue line),  $\alpha$ -pooling (red line), and CDFt (green line).

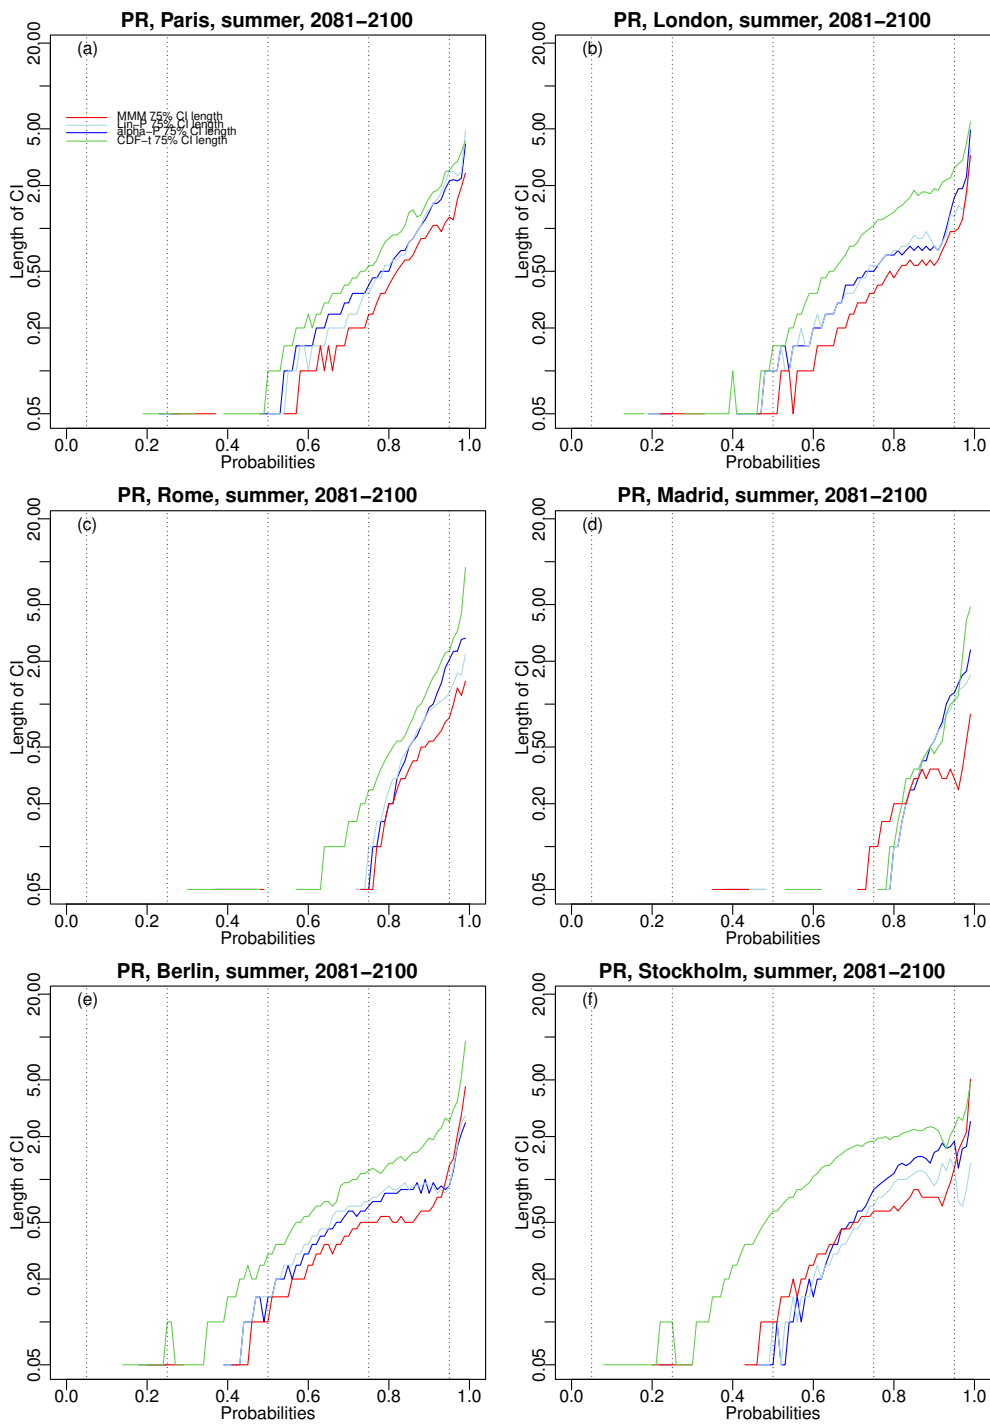

**Figure S14.** Same as Fig. S13 but for precipitation. Note that the y-axis is displayed in log-scale to ease evaluation.
